# Supplementary material
Source: Copernicus journal article supplement (doi:10.5194/egusphere-2026-3224)
Supplement: Supplementary file 1 [file egusphere-2026-3224-supplement.pdf]

1 Supplemental Information for

2 **Gravimetrically Measured Water Content of Filter Sampled Fine Particulate Matter at Low**  
3 **Relative Humidity: Insight from the Surface Particulate Matter Network (SPARTAN)**

4 Author list: Christopher R. Oxford<sup>1\*</sup>, Haihui Zhu<sup>1,2</sup>, Maya Mehrotra<sup>1</sup>, Xuan Liu<sup>1,3</sup>, Yuxuan  
5 Ren<sup>1</sup>, Maya Arnott<sup>1</sup>, Isaac Abionum Adimula<sup>4</sup>, Taiye Benjamin Ajibolataiye<sup>4</sup>, Clement  
6 Akoshile<sup>4</sup>, Omar Amador-Munoz<sup>5</sup>, Araya Asfaw<sup>6</sup>, Rachel Ying-Wen Chang<sup>7</sup>, Sagnik  
7 Dey<sup>8,9</sup>, Ann M. Dillner<sup>10</sup>, David J. Diner<sup>11</sup>, Connor J. Flynn<sup>12</sup>, Diana Francis<sup>13</sup>, Paterne  
8 Gahungu<sup>14</sup>, Rebecca M. Garland<sup>15,16</sup>, Michel Grutter<sup>5</sup>, Sina Hasheminassab<sup>11</sup>, Fahad  
9 Imam<sup>8</sup>, Jhoon Kim<sup>17</sup>, Kristy Langerman<sup>18</sup>, Pei-Chen Lee<sup>19</sup>, Puji Lestari<sup>20</sup>, Po-Hsiung  
10 Lin<sup>21</sup>, S. Marcela Loria-Salazar<sup>12</sup>, Tesfaye Mamo<sup>22</sup>, Olga L. Mayol-Bracero<sup>23</sup>, Mogesh  
11 Naidoo<sup>15</sup>, Narendra Nelli<sup>13</sup>, Sang Seo Park<sup>24</sup>, Abdus Salam<sup>25</sup>, Bighnaraj Sarangi<sup>23</sup>,  
12 Trailokya Saud<sup>26</sup>, Robyn Schofield<sup>27</sup>, Yoav Schechner<sup>28</sup>, Sachchida N. Tripathi<sup>29</sup>, Emily  
13 K. West<sup>12</sup>, Eli Windwer<sup>30</sup>, Ming-Tsang Wu<sup>31,32</sup>, Qiang Zhang<sup>33</sup>, Michael Brauer<sup>34</sup>, Yinon  
14 Rudich<sup>30</sup>, Jay R. Turner<sup>1</sup>, and Randall V. Martin<sup>1</sup>

15

16 <sup>1</sup> Department of Energy, Environmental & Chemical Engineering, Washington University  
17 in St. Louis, St. Louis, Missouri 63130, United States

18 <sup>2</sup> Department of Atmospheric Science, Colorado State University, Fort Collins, Colorado  
19 80521, United States

20 <sup>3</sup> Scripps Institution of Oceanography, University of California San Diego, San Diego,  
21 California 92093, United States

22 <sup>4</sup> Department of Physics, University of Ilorin, Ilorin, 240003, Nigeria

23 <sup>5</sup> Instituto de Ciencias de la Atmósfera y Cambio Climático, Universidad Nacional  
24 Autónoma de México, Mexico City, 04510, Mexico

25 <sup>6</sup> Institute of Geophysics and Space Science, Addis Ababa University, Addis  
26 Ababa, 1176, Ethiopia

27 <sup>7</sup> Department of Physics and Atmospheric Science, Dalhousie University, Halifax, Nova  
28 Scotia B3H 4R2, Canada

29 <sup>8</sup> Indian Institute of Technology Delhi, Hauz Khas, New Delhi, India 110016

30 <sup>9</sup> Adjunct Faculty, Department of Health, Management and Policy, Korea University,  
31 Seoul, South Korea

32 <sup>10</sup> Air Quality Research Center, University of California Davis, Davis, CA, USA

33 <sup>11</sup> Jet Propulsion Laboratory, California Institute of Technology, Pasadena, California,  
34 United States

35 <sup>12</sup> School of Meteorology, University of Oklahoma, Norman, Oklahoma, United States

36 <sup>13</sup> Environmental and Geophysical Sciences Lab, Earth Science Department, Khalifa  
37 University, Abu Dhabi, 127788, United Arab Emirates

38 <sup>14</sup> Institute of Applied Statistics, University of Burundi, Bujumbura, BP1550, Burundi

39 <sup>15</sup> Council for Scientific and Industrial Research, Pretoria, 0001, South Africa

40 <sup>16</sup> Department of Geography, Geo-Informatics and Meteorology, University of Pretoria,  
41 Pretoria, 0002, South Africa

42 <sup>17</sup> Department of Atmospheric Sciences, Yonsei University, Seoul, 03722, Republic of  
43 Korea

44 <sup>18</sup> Department of Geography, Environmental Management and Energy Studies,  
45 University of Johannesburg, Johannesburg, 2006, South Africa

46 <sup>19</sup> Department of Public Health, National Cheng Kung University, Tainan, 701, Taiwan

47 <sup>20</sup> Faculty of Civil and Environmental Engineering, Bandung Institute of Technology,  
48 Bandung, 40132, Indonesia

49 <sup>21</sup> Department of Atmospheric Sciences, National Taiwan University, Taipei, Taiwan

50 <sup>22</sup> Department of Physics, Addis Ababa University, Addis Ababa, Ethiopia

51 <sup>23</sup> Department of Environmental Science, University of Puerto Rico, Puerto Rico, 00931,  
52 United States

53 <sup>24</sup> Department of Urban and Environmental Engineering, Ulsan National Institute of  
54 Science and Technology, Ulsan, 44919, Republic of Korea

55 <sup>25</sup> Department of Chemistry, University of Dhaka, Dhaka, 1000, Bangladesh

56 <sup>26</sup> National Aerosol Facility, Indian Institute of Technology Kanpur, Kanpur, 208016, India

57 <sup>27</sup> School of Geography, Earth and Atmospheric Sciences, University of Melbourne,  
58 Melbourne, 3010, Australia

59 <sup>28</sup> Department of Electrical Engineering, Technion Israel Institute of Technology, Haifa,  
60 3200003, Israel

61 <sup>29</sup> Kotak School of Sustainability, Indian Institute of Technology Kanpur, Kanpur, 208016,  
62 India

63 <sup>30</sup> Department of Earth and Planetary Sciences, Weizmann Institute of Science,  
64 Rehovot, 76100, Israel

65 <sup>31</sup> Department of Family Medicine, Kaohsiung Medical University Hospital, Kaohsiung  
66 Medical University, Kaohsiung, 807, Taiwan

67 <sup>32</sup> PhD Program in Environmental and Occupational Medicine, Kaohsiung Medical  
68 University, Kaohsiung, 807, Taiwan

69 <sup>33</sup> School of Environment, Tsinghua University, Beijing, 100084, China

70 <sup>34</sup> School of Population and Public Health, University of British Columbia, Vancouver,  
71 British Columbia V6T 1Z3, Canada

72

73 Table S1. Site and host institutes of the SPARTAN sites used in this study.

| Site City    | Host Institute                                     | Latitude | Longitude |
|--------------|----------------------------------------------------|----------|-----------|
| Abu Dhabi    | Masdar Institute                                   | 24.44    | 54.62     |
| Addis Ababa  | Addis Ababa University                             | 9.01     | 38.82     |
| Bandung      | Bandung Institute of Technology                    | -6.89    | 107.61    |
| Beijing      | Tsinghua University                                | 40.00    | 116.33    |
| Bujumbura    | University of Burundi                              | -3.38    | 29.38     |
| Delhi        | Indian Institute of Technology Delhi               | 28.54    | 77.19     |
| Dhaka        | Dhaka University                                   | 23.73    | 90.40     |
| Fajardo      | Cabezas de San Juan Nature Reserve                 | 18.38    | -65.62    |
| Haifa        | Technion Israel Institute of Technology            | 32.78    | 35.02     |
| Halifax      | Dalhousie University                               | 44.64    | -63.59    |
| Ilorin       | Ilorin University                                  | 8.48     | 4.67      |
| Johannesburg | University of Johannesburg                         | -26.18   | 28        |
| Kanpur       | Indian Institute of Technology Kanpur              | 26.51    | 80.23     |
| Kaohsiung    | Kaohsiung Medical University                       | 22.65    | 120.31    |
| Melbourne    | The University of Melbourne                        | -37.8    | 144.97    |
| Mexico City  | Universidad Nacional Autónoma de México            | 19.33    | -99.18    |
| Norman       | University of Oklahoma                             | 35.18    | -97.44    |
| Pasadena     | Jet Propulsion Laboratory                          | 34.20    | -118.17   |
| Pretoria     | Council for Scientific and Industrial Research     | -25.76   | 28.28     |
| Rehovot      | Weizmann Institute                                 | 31.91    | 34.81     |
| Seoul        | Yonsei University                                  | 37.56    | 126.93    |
| Sherbrooke   | Sherbrooke University                              | 45.38    | -71.93    |
| Taipei       | National Taiwan University                         | 25.04    | 121.50    |
| Ulsan        | Ulsan National Institute of Science and Technology | 35.58    | 129.19    |

74

75 Supplemental Text S1: Acceptance of new polytetrafluoroethylene (PTFE) filters

76 Acceptance testing is performed on every box of PTFE filters by measuring the

77 contamination level on a select group of five new filters from the box of 100. The 5 filters

78 are pre-weighed by the Measurement Technology Laboratories AH500 system to

79 confirm the barcodes are legible and the filters have nominal weights between 90 and

80 100 mg. After weighing, we measure each filter using XRF. To be accepted all XRF

81 measurements must be less than the mean plus three times the standard deviation

82 determined from 100 laboratory blank filters selected from multiple boxes for all

83 measured species. After passing XRF, two of the five filters are extracted using

84 procedures defined in section 2.2. We then measure the extract using Ion

85 Chromatography. All species in the extract must be below mean plus 3 times standard

86 deviation determined from 100 laboratory blank filters from multiple boxes. The

87 remaining three unextracted filters are used as lab blanks for measurements at

88 University of California Davis.

89  
90

Table S2. The beginning and latest samples along with the protocol used during the sample period. Hours is the number of sampling hours per sample filter.

| Site city    | Start Date | Latest Date | Protocol | Hours per sample | Notes:                                           |
|--------------|------------|-------------|----------|------------------|--------------------------------------------------|
| Abu Dhabi    | 7/27/2020  | 7/21/2024   | SPARTAN  | 24               |                                                  |
|              | 7/31/2024  | 9/22/2024   | SPARTAN  | 12               |                                                  |
| Addis Ababa  | 12/7/2022  | 5/13/2024   | MAIA     | 24               |                                                  |
| Bandung      | 12/31/2019 | 7/11/2021   | SPARTAN  | 24               |                                                  |
| Beijing      | 3/24/2020  | 8/27/2022   | SPARTAN  | 24               |                                                  |
|              | 8/30/2022  | 6/16/2024   | MAIA     | 24               |                                                  |
|              | 6/26/2024  | 8/18/2024   | SPARTAN  | 24               |                                                  |
| Bujumbura    | 12/9/2022  | 8/9/2024    | SPARTAN  | 24               |                                                  |
| Delhi        | 3/5/2024   | 5/13/2024   | MAIA     | 12               |                                                  |
| Dhaka        | 8/11/2020  | 7/17/2023   | SPARTAN  | 24               | Contains period of special protocol <sup>a</sup> |
|              | 8/15/2023  | 6/2/2024    | SPARTAN  | 12               |                                                  |
| Fajardo      | 3/18/2021  | 2/7/2024    | SPARTAN  | 24               |                                                  |
|              | 2/16/2022  | 4/11/2023   | MAIA     | 24               |                                                  |
| Haifa        | 2/16/2022  | 4/11/2023   | MAIA     | 24               |                                                  |
| Halifax      | 1/14/2020  | 2/12/2024   | SPARTAN  | 48               |                                                  |
| Ilorin       | 6/22/2020  | 12/1/2021   | SPARTAN  | 24               |                                                  |
| Johannesburg | 4/10/2022  | 1/12/2024   | MAIA     | 24               |                                                  |
|              | 1/23/2024  | 7/26/2024   | SPARTAN  | 24               |                                                  |
| Kanpur       | 7/14/2021  | 5/24/2022   | SPARTAN  | 24               |                                                  |
| Kaohsiung    | 8/20/2022  | 1/25/2024   | MAIA     | 24               |                                                  |
|              | 2/21/2024  | 7/26/2024   | SPARTAN  | 24               |                                                  |
| Melbourne    | 8/9/2022   | 5/20/2024   | SPARTAN  | 24               |                                                  |
| Mexico City  | 2/26/2021  | 6/9/2024    | SPARTAN  | 24               |                                                  |
| Norman       | 6/28/2023  | 3/18/2024   | SPARTAN  | 24               |                                                  |
| Pasadena     | 11/9/2021  | 8/23/2024   | MAIA     | 24               | Contains period of special protocol <sup>b</sup> |
|              | 10/22/2020 | 4/5/2021    | SPARTAN  | 24               |                                                  |
| Pretoria     | 4/15/2021  | 1/24/2024   | MAIA     | 24               |                                                  |
|              | 5/17/2024  | 7/1/2024    | SPARTAN  | 24               |                                                  |
|              | 7/2/2020   | 4/13/2021   | SPARTAN  | 24               |                                                  |
| Rehovot      | 11/5/2021  | 6/7/2023    | MAIA     | 24               |                                                  |
|              | 9/11/2020  | 1/8/2024    | SPARTAN  | 24               |                                                  |
| Sherbrooke   | 3/10/2020  | 8/22/2024   | SPARTAN  | 48               |                                                  |
| Taipei       | 1/27/2022  | 2/9/2024    | MAIA     | 24               |                                                  |
|              | 2/18/2024  | 8/4/2024    | SPARTAN  | 24               |                                                  |
| Ulsan        | 10/28/2021 | 8/22/2024   | SPARTAN  | 24               |                                                  |

91 <sup>a</sup> – this sampling period contains co-located (2 sampling stations), continuous samples from June and  
 92 July 2023. <sup>b</sup> – this sampling period contains pseudo co-located (1 sampling station) samples from March  
 93 to August 2024.

94

95

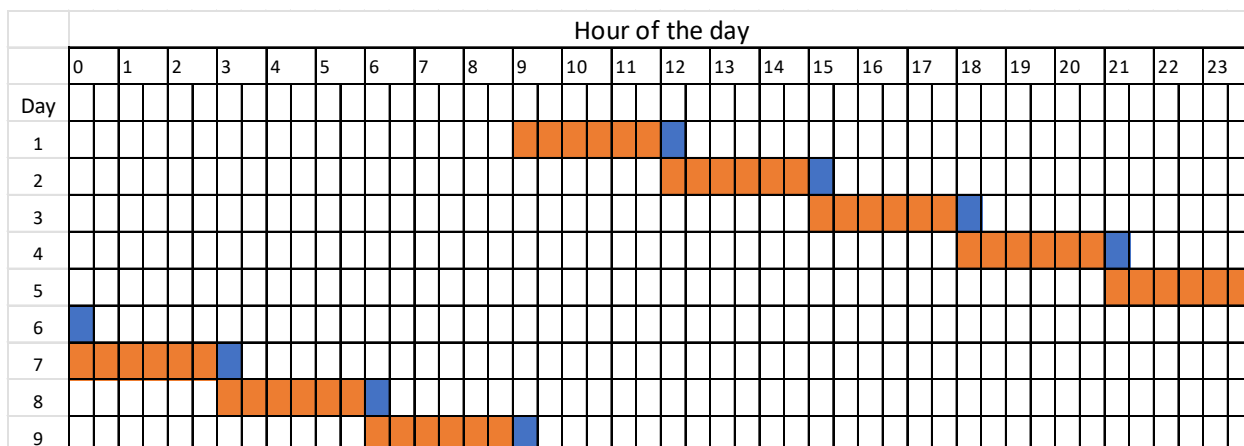

96

97 Figure S1. Example SPARTAN 9-day sampling protocol. A 24-hour diurnal cycle is collected over the course of 9  
98 days. Orange represents PM<sub>2.5</sub> sampling; blue represents PM<sub>10</sub> sampling. In this example, a single PM<sub>2.5</sub> filter is  
99 sampled for 24 hours. The PM<sub>10</sub> filter is sampled for 4 hours during each of 6 PM<sub>2.5</sub> filters in a cartridge.

100

### 101 Supplemental Text S2: Fourier Transfer Infrared (FTIR) spectroscopy

102 All filter samples were scanned 512 times by an FTIR instrument from 4000 to  
103 420 cm<sup>-1</sup> in transmission mode. This process began with purging the measurement  
104 chamber with dry air without carbon dioxide. The resulting scan was converted to  
105 absorbance using the zero-reference signal. The subsequent spectra was then baseline  
106 corrected using multiple lab blank filters from the same lot. A calibration model of  
107 elemental carbon (EC) and organic carbon (OC) created using 22 IMPROVE sites with  
108 parallel measurements of EC and OC using Thermal-Optical-Reflectance (TOR) (Dillner  
109 and Takahama, 2015a, b; Reggente et al., 2016) was used to quantify the mass of the  
110 EC and OC species.

111

112

113

114

115

116

117

118

119

120

121

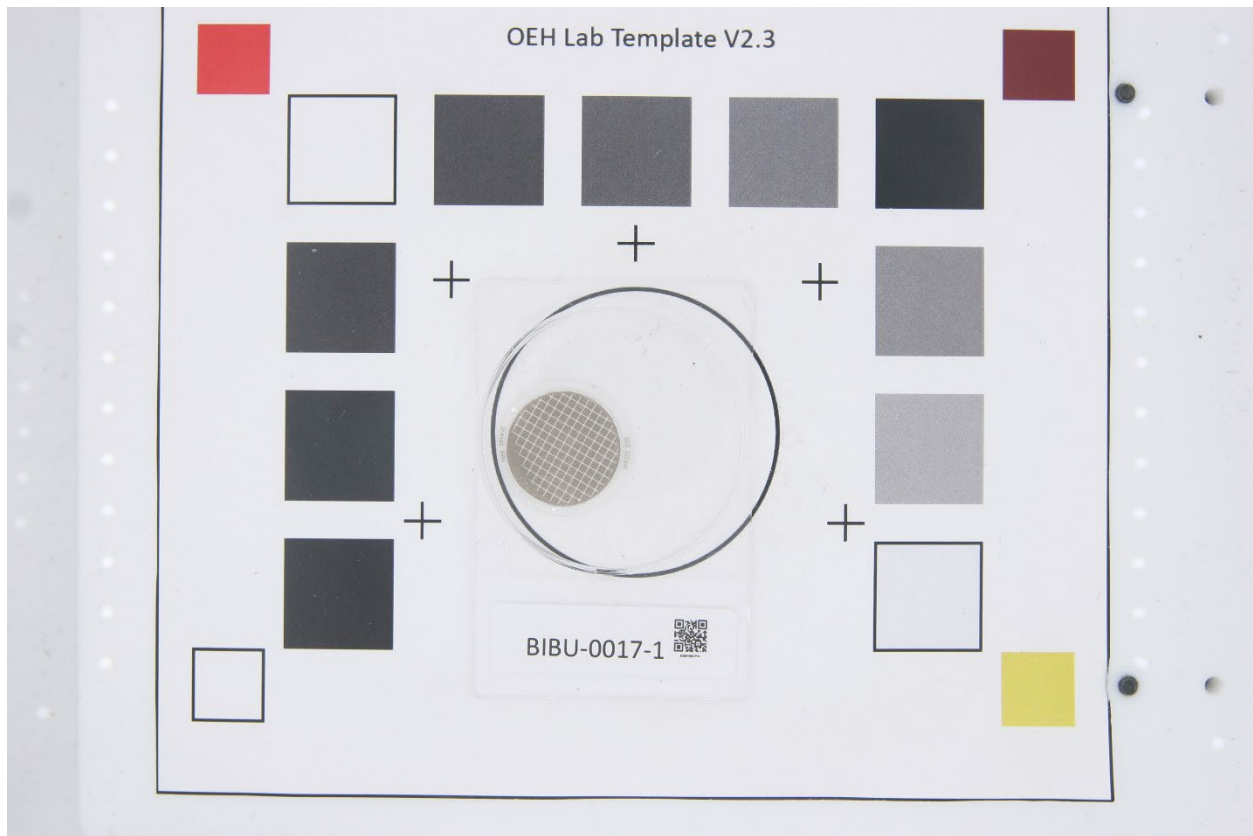

122

123 Figure S2. An example individual photograph on the calibrated background as mentioned in Section 2.2. This filter is  
124 a member of the 12 filters in the Bujumbura proxy sample.

125

### 126 Supplemental Text S3: UV-Vis spectroscopy

127 All filter samples were scanned with a PerkinElmer LAMBDA 35 UV-Vis  
128 spectrophotometer with an integrating sphere installed between two sample holders as  
129 described by Zhong and Jang (2011). The transmittance and reflectance were both  
130 measured with the sample facing towards the light source. The transmittance was  
131 measured by placing the sample in between the light source and the sphere with the  
132 downstream sample holder containing a white standard. The reflectance was measured  
133 by placing the sample in the downstream sample holder with an empty upstream  
134 sample holder. The two measurement values were then placed into an empirical  
135 relationship to determine Mass Absorption Cross section (MAC) (Pandey et al., 2019).  
136 The empirical relationship was based upon 90 measurements of various aerosols with a  
137 Single Scattering Albedos ranging from 0.25 to 0.99.

138

139 Supplemental Text S4: Labware cleaning procedures

140 The cleaning process for the scintillation vials began with 24 hours in a bath of  
141 1% nitric acid. After 24 hours in the acid bath, the vials were rinsed with deionized water  
142 3 times and 1 time with ACS grade methanol. The vials were then lightly tamped on a  
143 surface until all standing liquid was removed from the vial. The vial then dried inverted  
144 overnight. After drying, the vials were wrapped in aluminum foil and baked in an oven at  
145 500 °C for 5 hours. After cooling, the vials were stored for future use. All syringes were  
146 cleaned by submersion in ACS grade methanol once, and then by submersion in  
147 deionized water 3 times. The syringes were then lightly tamped until all visible water  
148 was removed and then left inverted to dry. The syringes were then reassembled and  
149 wrapped with aluminum foil until future use. The opaque Nalgene vials were also  
150 submerged in methanol once and submerged in deionized water 3 times. They were  
151 tamped until all water was removed and placed inverted to dry. The syringe filters are  
152 rinsed before use with 8 to 10 ml of deionized water immediately prior to use.

153

154 Supplemental Text S5: Choice of linear model for evaporation.

155 Equation S1 describes the evaporation of a single particle.

156 
$$MFR = \left(1 - \frac{2D}{\rho_p r_p^2} C^* t\right)^{(3/2)} \quad (S1)$$

157 where *MFR* is the mass fraction remaining, *D* is diffusivity of the evaporating species in  
158 the gas phase (assumed 10<sup>-5</sup> cm<sup>2</sup>/s),  $\rho_p$  is the particle density (assumed 1.2 g/cm<sup>3</sup>), *r<sub>p</sub>* is  
159 the initial radius of the particle (assumed 400 nm), *C\** is the mass concentration of the  
160 gas phase in equilibrium at the particle surface, and *t* is time.

161 Figure S3 shows the results when Equation S1 is fit to Beijing data, which is the  
162 fastest evaporating sample in the study. In the fitting process, *C\** was used as the fitted  
163 parameter. The resulting *C\** value is 2.67 µg/m<sup>3</sup>, which is similar to other atmospheric  
164 aerosols (Donahue et al., 2006). The left panel shows that the evaporation curve is not  
165 linear over timescales of thousands of hours. However, the right panel shows that over  
166 the time range of the experiment, the evaporation model is approximately linear.

167

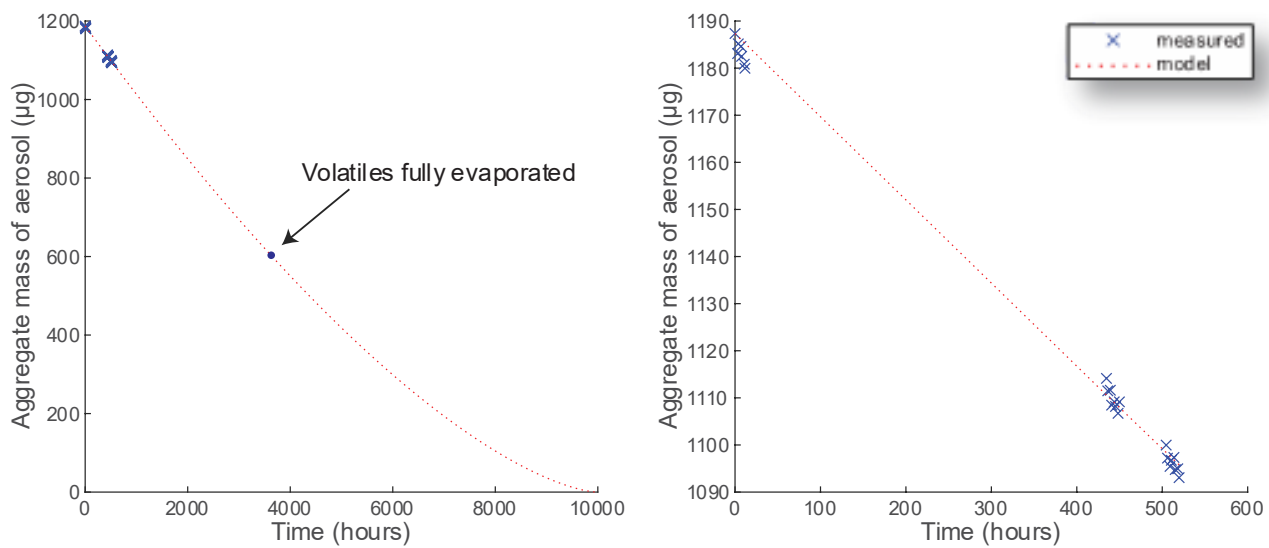

168

169

170

171

Figure S3. Equation S1 fit to the Beijing evaporation data. The left panel displays evaporation of the entire particle. However, the volatiles should be fully evaporated by 3629 hours using this model. The right panel highlights the first 600 hours of that evaporation.

172

173

174

175

176 Supplemental Figures displaying the raw measurements from the remaining sites  
177

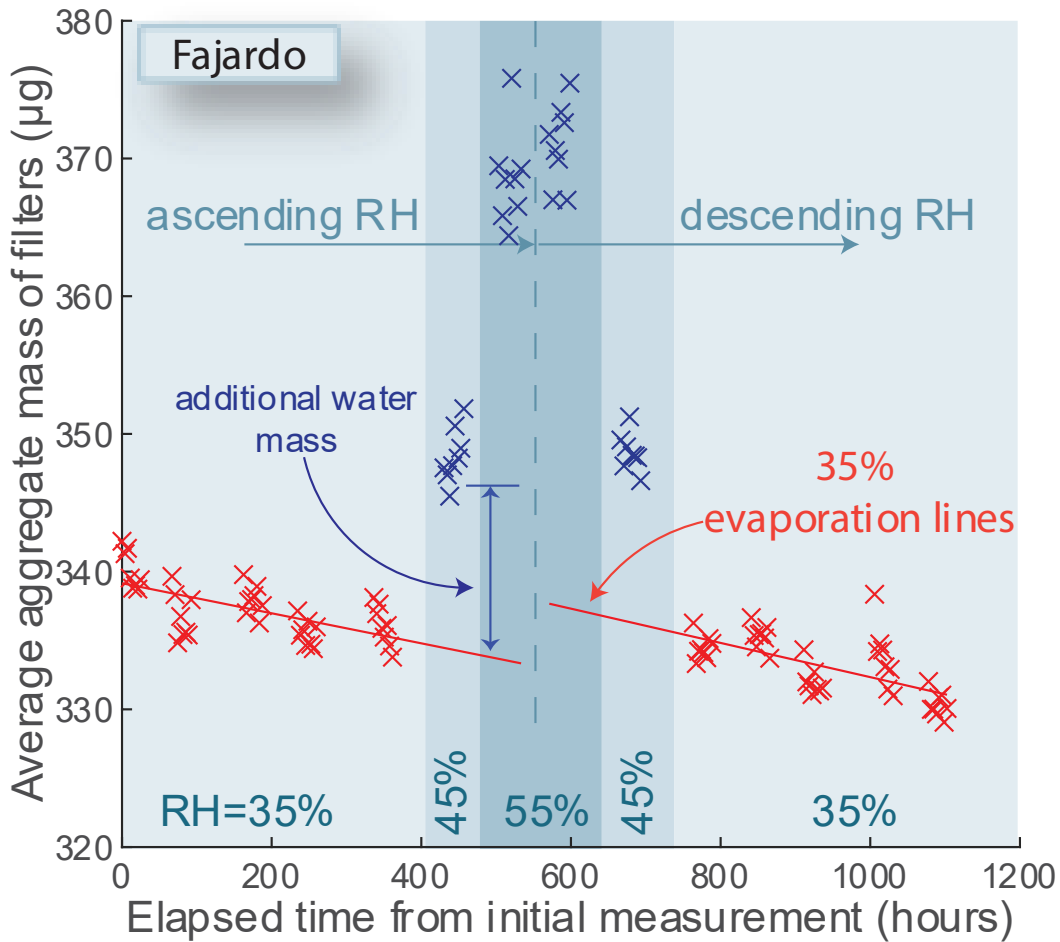

178  
179

180 Figure S4. The RH-gravimetric response of filters from Fajardo, Puerto Rico. The red evaporation lines connect the  
181 measurements at 35% relative humidity (red X's). The change in water mass is the difference between the mass  
182 measurements at elevated relative humidity (blue X's) and the red evaporation line. Shading in the plot represents the  
183 different relative humidities in the experiment.

184  
185  
186  
187  
188  
189

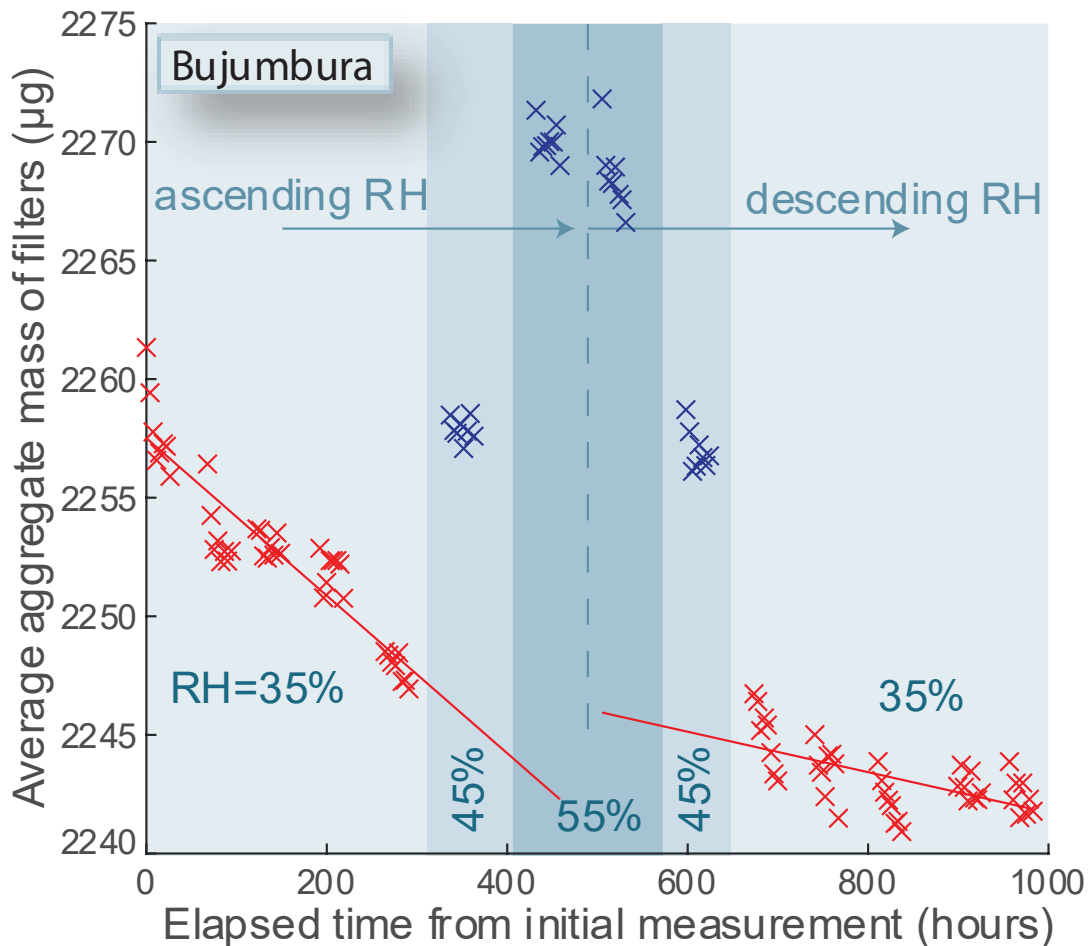

190

191

192 Figure S5. The RH-gravimetric response of filters from Bujumbura, Burundi. The red evaporation lines connect the  
 193 measurements at 35% relative humidity (red X's). The change in water mass is the difference between the mass  
 194 measurements at elevated relative humidity (blue X's) and the red evaporation line. Shading in the plot represents the  
 195 different relative humidities in the experiment.

196

197

198 Supplemental Text S6: Calculation of uncertainty from the original datasets

199 We assumed that two different sources of uncertainty impact the measurements:  
 200 subgroup uncertainty (short-term) and group uncertainty (long-term). We characterized  
 201 both uncertainties and then used those two uncertainties to deviate the original dataset.  
 202 This new faux dataset was used with the original scripts to calculate the variables of  
 203 interest.

204 The subgroup uncertainty was calculated using all subgroups in the dataset. The  
 205 group average was subtracted from the subgroup to calculate a subgroup deviation

206 (deviation from the group mean). Then each subgroup deviation was placed in temporal  
207 measurement order: all first subgroups deviations are grouped together, all second  
208 subgroup deviations are grouped together, up to the eighth subgroup creating  
209 distributions of all 8 subgroups. Assuming normality, we calculated the average and  
210 standard deviation for each of the eight subgroups while excluding outliers.

211 The group uncertainty is calculated using the 35% RH data only. We calculated  
212 the deviations between each group average and the fitted 35% evaporation line. This  
213 generated a set of group deviations which again is assumed normal. We then calculated  
214 the group average and group standard deviation.

215 To generate a new dataset, the group average from the original dataset was  
216 calculated (for all RH in the dataset). Then each group average was deviated using the  
217 group deviation distribution. Lastly, each subgroup was calculated by deviating the faux  
218 group average using the 8 subgroup distributions. This generated a faux dataset. An  
219 example is shown in Figure S6.

220 We generated a faux dataset for each of the three proxy samples (Abu Dhabi,  
221 Fajardo, and Bujumbura) and then fed them through all scripts to determine the water  
222 content for each growth category. We created 10,000 groups of three faux datasets  
223 which were used to calculate uncertainty in the water content of each growth category.

224

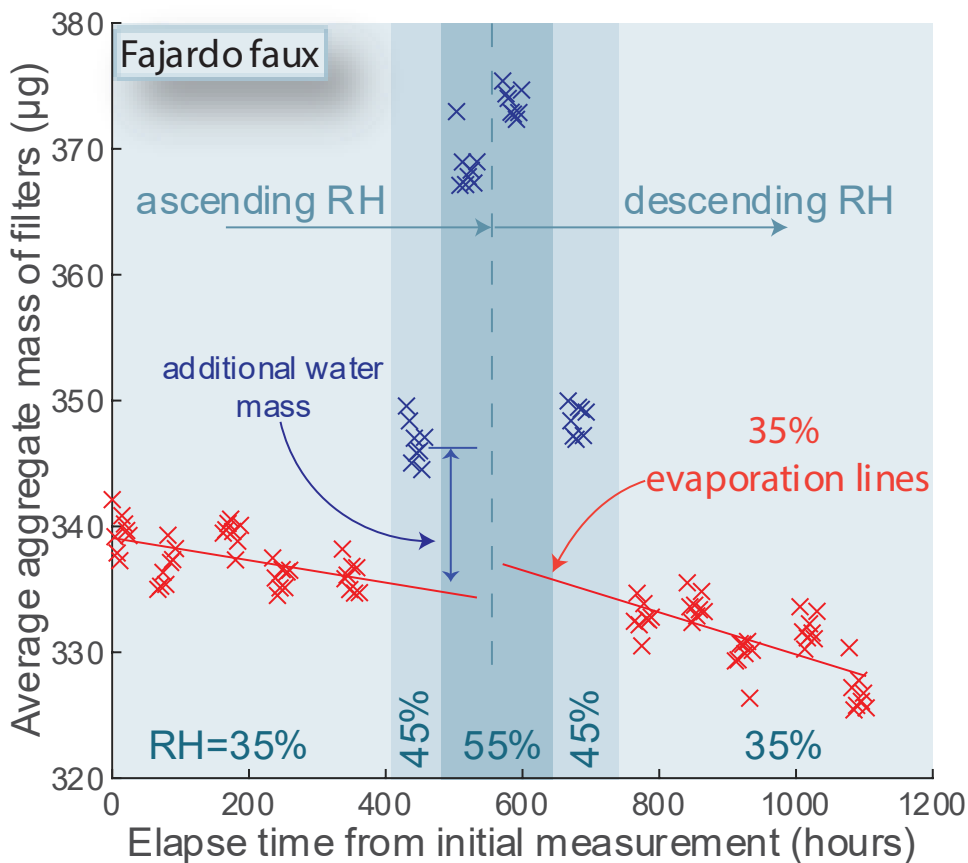

225

226

Figure S6. A faux dataset generated from the original Fajardo dataset shown in Figure S5.

227

228

229

230

231

Table S3. Predicted water content at 40% RH using the solved water categories compared to the measurements by McInnes et al. (1996) at the same RH.

| Growth Category      | This study prediction<br>Mean (95% CI) | McInnes et al. (1996)<br>measurements<br>Mean (Range) |
|----------------------|----------------------------------------|-------------------------------------------------------|
| High Growth (NaCl)   | 20.3% (14.9-30.5%)                     | 26.4% (19.9-32.6%) (lab sea salt)                     |
| Med Growth (A-N-S-K) | 4.76% (3.72-5.03%)                     | 3.76% (0-8.1%) (ammonium sulfate)                     |

232

233

234 Table S4. Average composition in  $\mu\text{g}/\text{m}^3$  of the samples used in the study.

| Site         | PM <sub>2.5</sub> | BC   | TEO  | Dust  | Na <sup>+</sup> | NO <sub>3</sub> <sup>-</sup> | NH <sub>4</sub> <sup>+</sup> | SO <sub>4</sub> <sup>2-</sup> | PBW  | Cl <sup>-</sup> | K <sup>+</sup> | RM    |
|--------------|-------------------|------|------|-------|-----------------|------------------------------|------------------------------|-------------------------------|------|-----------------|----------------|-------|
| Abu Dhabi    | 32.93             | 2.62 | 0.14 | 13.01 | 0.28            | 0.10                         | 3.20                         | 13.03                         | 0.74 | 0.02            | 0.04           | -0.22 |
| Melbourne    | 4.79              | 0.52 | 0.01 | 0.56  | 0.13            | 0.00                         | 0.02                         | 0.64                          | 0.10 | 0.09            | 0.00           | 2.71  |
| Dhaka        | 37.52             | 4.61 | 6.61 | 6.53  | 0.10            | 0.17                         | 0.74                         | 6.08                          | 0.55 | 0.58            | 0.41           | 11.15 |
| Bujumbura    | 30.67             | 3.68 | 0.12 | 2.06  | 0.04            | 0.00                         | 0.17                         | 1.61                          | 0.36 | 0.01            | 0.95           | 21.67 |
| Halifax      | 3.11              | 0.23 | 0.01 | 0.25  | 0.01            | 0.00                         | 0.01                         | 0.50                          | 0.05 | 0.03            | 0.01           | 1.99  |
| Sherbrooke   | 4.64              | 0.37 | 0.01 | 0.41  | 0.00            | 0.05                         | 0.06                         | 0.59                          | 0.06 | 0.00            | 0.00           | 3.09  |
| Beijing      | 25.49             | 1.45 | 0.18 | 4.37  | 0.05            | 4.56                         | 2.19                         | 3.88                          | 0.56 | 0.03            | 0.22           | 8.01  |
| Addis Ababa  | 21.66             | 4.71 | 0.07 | 5.07  | 0.01            | 0.00                         | 0.44                         | 2.07                          | 0.21 | 0.01            | 0.21           | 8.86  |
| Bandung      | 27.30             | 3.40 | 0.19 | 1.34  | 0.00            | 0.00                         | 1.64                         | 5.24                          | 0.46 | 0.00            | 0.27           | 14.75 |
| Haifa        | 12.85             | 0.81 | 0.05 | 3.30  | 0.10            | 0.03                         | 1.31                         | 4.08                          | 0.28 | 0.03            | 0.00           | 2.85  |
| Rehovot      | 14.21             | 1.25 | 0.07 | 3.73  | 0.05            | 0.16                         | 1.21                         | 3.94                          | 0.27 | 0.02            | 0.00           | 3.51  |
| Delhi        | 55.40             | 5.98 | 1.00 | 9.95  | 0.38            | 0.47                         | 2.43                         | 7.95                          | 1.25 | 2.40            | 1.86           | 21.74 |
| Kanpur       | 43.88             | 4.24 | 0.56 | 10.83 | 0.14            | 0.43                         | 1.93                         | 7.84                          | 0.68 | 0.04            | 1.09           | 16.08 |
| Seoul        | 18.14             | 1.19 | 0.11 | 2.37  | 0.00            | 2.03                         | 1.70                         | 2.99                          | 0.36 | 0.00            | 0.04           | 7.36  |
| Ulsan        | 12.65             | 0.76 | 0.13 | 2.01  | 0.06            | 0.62                         | 1.15                         | 2.48                          | 0.25 | 0.05            | 0.01           | 5.13  |
| Mexico City  | 15.51             | 2.15 | 0.08 | 1.26  | 0.00            | 0.00                         | 1.10                         | 3.17                          | 0.26 | 0.00            | 0.09           | 7.40  |
| Ilorin       | 25.63             | 3.06 | 1.01 | 11.22 | 0.00            | 0.00                         | 0.08                         | 1.56                          | 0.19 | 0.11            | 0.42           | 7.99  |
| Fajardo      | 6.49              | 0.10 | 0.01 | 2.44  | 0.74            | 0.00                         | 0.07                         | 0.98                          | 0.34 | 0.95            | 0.01           | 0.85  |
| Kaohsiung    | 16.91             | 1.37 | 0.17 | 1.84  | 0.15            | 1.40                         | 1.34                         | 3.74                          | 0.37 | 0.01            | 0.07           | 6.45  |
| Taipei       | 8.90              | 0.84 | 0.06 | 1.10  | 0.05            | 0.07                         | 0.70                         | 2.47                          | 0.18 | 0.02            | 0.02           | 3.39  |
| Norman       | 6.20              | 0.37 | 0.00 | 1.09  | 0.00            | 0.00                         | 0.28                         | 0.73                          | 0.08 | 0.00            | 0.00           | 3.64  |
| Pasadena     | 6.97              | 0.42 | 0.02 | 0.77  | 0.04            | 0.31                         | 0.26                         | 1.04                          | 0.12 | 0.01            | 0.02           | 3.97  |
| Johannesburg | 16.75             | 2.45 | 0.19 | 1.30  | 0.00            | 0.03                         | 1.16                         | 3.57                          | 0.30 | 0.01            | 0.30           | 7.45  |
| Pretoria     | 16.97             | 2.31 | 0.10 | 1.65  | 0.00            | 0.01                         | 1.26                         | 3.80                          | 0.30 | 0.00            | 0.23           | 7.31  |
| Average      | 19.40             | 2.04 | 0.45 | 3.69  | 0.10            | 0.43                         | 1.02                         | 3.50                          | 0.35 | 0.18            | 0.26           | 7.38  |

PBW is the calculated water mass at 35% RH. RM indicates residual matter.

235  
236  
237  
238

Table S5. Distribution of samples through the seasons along with the average PM<sub>2.5</sub> concentration.

| Site         | N   | DJF | MAM | JJA | SON | PM <sub>2.5</sub><br>concentration |
|--------------|-----|-----|-----|-----|-----|------------------------------------|
| Abu Dhabi    | 93  | 23  | 18  | 32  | 20  | 32.93                              |
| Melbourne    | 47  | 16  | 16  | 5   | 10  | 4.79                               |
| Dhaka        | 53  | 0   | 6   | 42  | 5   | 37.52                              |
| Bujumbura    | 37  | 12  | 10  | 14  | 1   | 30.67                              |
| Halifax      | 91  | 18  | 14  | 22  | 37  | 3.11                               |
| Sherbrooke   | 61  | 16  | 22  | 16  | 7   | 4.64                               |
| Beijing      | 197 | 38  | 55  | 49  | 55  | 25.49                              |
| Addis Ababa  | 162 | 57  | 51  | 28  | 26  | 21.66                              |
| Bandung      | 14  | 2   | 4   | 8   | 0   | 27.30                              |
| Haifa        | 142 | 29  | 45  | 37  | 31  | 12.85                              |
| Rehovot      | 162 | 55  | 29  | 37  | 41  | 14.21                              |
| Delhi        | 20  | 0   | 20  | 0   | 0   | 55.40                              |
| Kanpur       | 15  | 3   | 6   | 5   | 1   | 43.88                              |
| Seoul        | 73  | 20  | 19  | 15  | 19  | 18.14                              |
| Ulsan        | 96  | 24  | 29  | 24  | 19  | 12.65                              |
| Mexico City  | 53  | 17  | 20  | 8   | 8   | 15.51                              |
| Ilorin       | 17  | 6   | 1   | 3   | 7   | 25.63                              |
| Fajardo      | 54  | 15  | 10  | 13  | 16  | 6.49                               |
| Kaohsiung    | 139 | 47  | 27  | 33  | 32  | 16.91                              |
| Taipei       | 241 | 61  | 50  | 66  | 64  | 8.90                               |
| Norman       | 12  | 4   | 2   | 3   | 3   | 6.20                               |
| Pasadena     | 246 | 70  | 38  | 75  | 63  | 6.97                               |
| Johannesburg | 188 | 40  | 42  | 53  | 53  | 16.75                              |
| Pretoria     | 230 | 41  | 62  | 67  | 60  | 16.97                              |

240  
241  
242  
243  
244  
245  
246  
247  
248  
249  
250  
251

DJF – number of samples with stop sampling dates occurring in the months of December, January, and February.  
MAM – number of samples with stop sampling dates occurring in the months of March, April, and May. JJA – number of samples with stop sampling dates occurring in the months of June, July, and August. SON – number of samples with stop sampling dates occurring in the months of September, October, and November.

252  
253  
254

Table S6. Number of samples (N) obtained from each site along with the date of the first and last sample obtained. The percentage water calculated from the composition for the period and the fraction of water attributable to each growth category are also included.

| Site         | First sample Date | Latest sample Date | N   | High growth category | Middle growth category | Low growth category | Percent water |
|--------------|-------------------|--------------------|-----|----------------------|------------------------|---------------------|---------------|
| Abu Dhabi    | 7/27/2020         | 9/22/2024          | 93  | 0.108                | 0.882                  | 0.010               | 2.274         |
| Melbourne    | 8/9/2022          | 5/20/2024          | 47  | 0.558                | 0.313                  | 0.129               | 3.108         |
| Dhaka        | 8/11/2020         | 6/2/2024           | 53  | 0.267                | 0.549                  | 0.184               | 1.535         |
| Bujumbura    | 12/9/2022         | 8/9/2024           | 37  | 0.073                | 0.321                  | 0.606               | 1.182         |
| Halifax      | 1/14/2020         | 2/12/2024          | 91  | 0.420                | 0.375                  | 0.205               | 2.551         |
| Sherbrooke   | 3/10/2020         | 8/22/2024          | 61  | 0.119                | 0.509                  | 0.371               | 1.639         |
| Beijing      | 3/24/2020         | 8/18/2024          | 197 | 0.060                | 0.798                  | 0.142               | 2.165         |
| Addis Ababa  | 12/7/2022         | 5/13/2024          | 162 | 0.094                | 0.539                  | 0.367               | 1.072         |
| Bandung      | 12/31/2019        | 7/11/2021          | 14  | 0.073                | 0.615                  | 0.313               | 1.729         |
| Haifa        | 2/16/2022         | 6/17/2023          | 142 | 0.167                | 0.747                  | 0.086               | 2.346         |
| Rehovot      | 7/2/2020          | 6/7/2023           | 162 | 0.132                | 0.757                  | 0.112               | 2.070         |
| Delhi        | 3/5/2024          | 5/13/2024          | 20  | 0.395                | 0.424                  | 0.181               | 2.189         |
| Kanpur       | 7/14/2021         | 5/24/2022          | 15  | 0.088                | 0.672                  | 0.240               | 1.537         |
| Seoul        | 9/11/2020         | 1/8/2024           | 73  | 0.039                | 0.761                  | 0.200               | 1.995         |
| Ulsan        | 10/28/2021        | 8/22/2024          | 96  | 0.155                | 0.666                  | 0.179               | 2.131         |
| Mexico City  | 2/26/2021         | 6/9/2024           | 53  | 0.037                | 0.689                  | 0.274               | 1.710         |
| Ilorin       | 6/22/2020         | 12/1/2021          | 17  | 0.215                | 0.434                  | 0.352               | 0.851         |
| Fajardo      | 3/18/2021         | 2/7/2024           | 54  | 0.820                | 0.162                  | 0.019               | 5.470         |
| Kaohsiung    | 8/20/2022         | 7/26/2024          | 139 | 0.162                | 0.687                  | 0.150               | 2.350         |
| Taipei       | 1/27/2022         | 8/4/2024           | 241 | 0.206                | 0.658                  | 0.136               | 2.408         |
| Norman       | 6/28/2023         | 3/18/2024          | 12  | 0.061                | 0.541                  | 0.398               | 1.419         |
| Pasadena     | 11/9/2021         | 8/23/2024          | 246 | 0.234                | 0.524                  | 0.241               | 2.110         |
| Johannesburg | 4/10/2022         | 7/26/2024          | 188 | 0.057                | 0.697                  | 0.246               | 1.785         |
| Pretoria     | 10/22/2020        | 7/1/2024           | 230 | 0.065                | 0.703                  | 0.231               | 1.824         |
| Average      |                   |                    |     | 0.192                | 0.584                  | 0.224               | 2.060         |

255  
256  
257  
258

259 References

260

261 Dillner, A. and Takahama, S.: Predicting ambient aerosol thermal-optical reflectance  
262 measurements from infrared spectra: elemental carbon, *Atmos. Meas. Tech.*, 8, 4013–  
263 4023, 10.5194/amt-8-4013-2015, 2015a.

264 Dillner, A. and Takahama, S.: Predicting ambient aerosol thermal-optical reflectance  
265 (TOR) measurements from infrared spectra: organic carbon, *Atmos. Meas. Tech.*, 8,  
266 1097–1109, 10.5194/amt-8-1097-2015, 2015b.

267 Donahue, N., Robinson, A., Stanier, C., and Pandis, S.: Coupled partitioning, dilution,  
268 and chemical aging of semivolatile organics, *Environ. Sci. Technol.*, 40, 2635–2643,  
269 10.1021/es052297c, 2006.

270 McInnes, L. M., Quinn, P. K., Covert, D. S., and Anderson, T. L.: Gravimetric analysis,  
271 ionic composition, and associated water mass of the marine aerosol, *Atmos. Environ.*,  
272 30, 869–884, 10.1016/1352-2310(95)00354-1, 1996.

273 Pandey, A., Shetty, N., and Chakrabarty, R.: Aerosol light absorption from optical  
274 measurements of PTFE membrane filter samples: sensitivity analysis of optical depth  
275 measures, *Atmos. Meas. Tech.*, 12, 1365–1373, 10.5194/amt-12-1365-2019, 2019.

276 Reggente, M., Dillner, A., and Takahama, S.: Predicting ambient aerosol thermal-optical  
277 reflectance (TOR) measurements from infrared spectra: extending the predictions to  
278 different years and different sites, *Atmos. Meas. Tech.*, 9, 441–454, 10.5194/amt-9-441-  
279 2016, 2016.

280 Zhong, M. and Jang, M.: Light absorption coefficient measurement of SOA using a UV-  
281 Visible spectrometer connected with an integrating sphere, *Atmos. Environ.*, 45, 4263–  
282 4271, 10.1016/j.atmosenv.2011.04.082, 2011.

283
